# Supplementary material
Source: PubMed Central journal article supplement (PMC3856195)

## eFigure Legends

eFigure 1. Change in number of depressive symptoms on the Center for Epidemiological Studies Depression scale.

eFigure 2. Relation of brainstem tangle density to depressive symptoms in persons with no (green) and mild (orange) cognitive impairment, adjusted for age at death, sex, and education.

eFigure 3. Distributions of aminergic neuronal density in brainstem nuclei.

eTable 1. Antidepressant medication use in 40 participants<sup>a</sup>

| Antidepressant Class                        | Medication    | Number of participants |
|---------------------------------------------|---------------|------------------------|
| Selective norepinephrine reuptake inhibitor | duloxetine    | 1                      |
|                                             | venlafaxine   | 5                      |
| Selective serotonin reuptake inhibitor      | citalopram    | 2                      |
|                                             | escitalopram  | 8                      |
|                                             | fluoxetine    | 1                      |
|                                             | paroxetine    | 9                      |
|                                             | sertraline    | 21                     |
| Tetracyclic                                 | mirtazapine   | 7                      |
| Tricyclic                                   | amitriptyline | 7                      |
|                                             | nortriptyline | 1                      |

<sup>a</sup> Number of participants who used a medication at least once during the observation period.

eTable 2. Relation of demographic and postmortem variables to density of aminergic neurons in brainstem nuclei\*

| Covariate                  | Locus Coeruleus            | Dorsal Raphe Nucleus      | Substantia Nigra          | Ventral Tegmental Area    |
|----------------------------|----------------------------|---------------------------|---------------------------|---------------------------|
| Age at death               | $r = -0.09, p = 0.33$      | $r = 0.08, p = 0.40$      | $r = -0.12, p = 0.20$     | $r = -0.18, p = 0.061$    |
| Sex                        | $t[116] = -0.06, p = 0.52$ | $t[115] = -0.4, p = 0.70$ | $t[111] = -0.9, p = 0.37$ | $t[109] = -1.4, p = 0.16$ |
| Education                  | $r = 0.14, p = 0.12$       | $r = 0.02, p = 0.80$      | $r = 0.03, p = 0.72$      | $r = 0.03, p = 0.75$      |
| Last evaluation, months    | $r = -0.10, p = 0.30$      | $r = -0.08, p = 0.39$     | $r = -0.02, p = 0.87$     | $r = 0.01, p = 0.89$      |
| Postmortem interval, hours | $r = 0.04, p = 0.64$       | $r = -0.12, p = 0.21$     | $r = -0.23, p = 0.02$     | $r = -0.03, p = 0.73$     |
| pH                         | $r = 0.14, p = 0.13$       | $r = 0.11, p = 0.23$      | $r = 0.23, p = 0.02$      | $r = 0.01, p = 0.91$      |
| Brainstem Lewy bodies      | $r = -0.06, p = 0.52$      | $r = 0.08, p = 0.41$      | $r = -0.21, p = 0.02$     | $r = -0.19, p = 0.046$    |
| Brainstem tangles          | $r = 0.04, p = 0.65$       | $r = 0.13, p = 0.17$      | $r = 0.09, p = 0.32$      | $r = 0.02, p = 0.84$      |

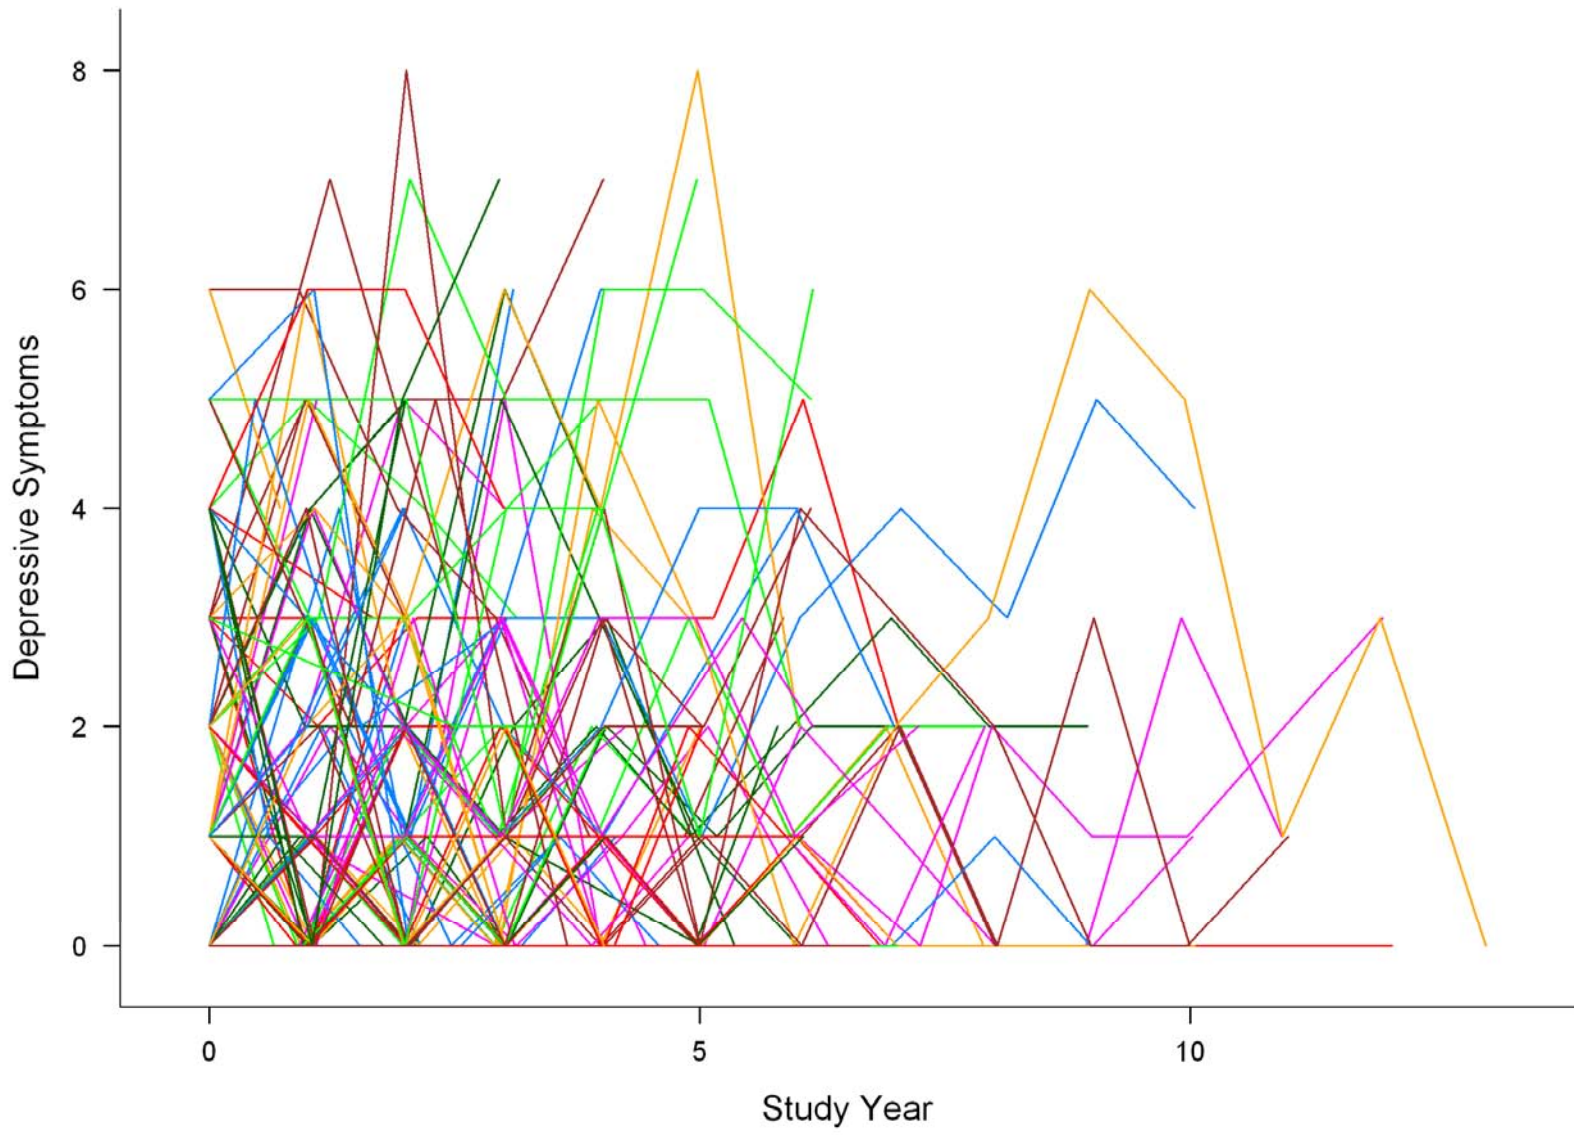

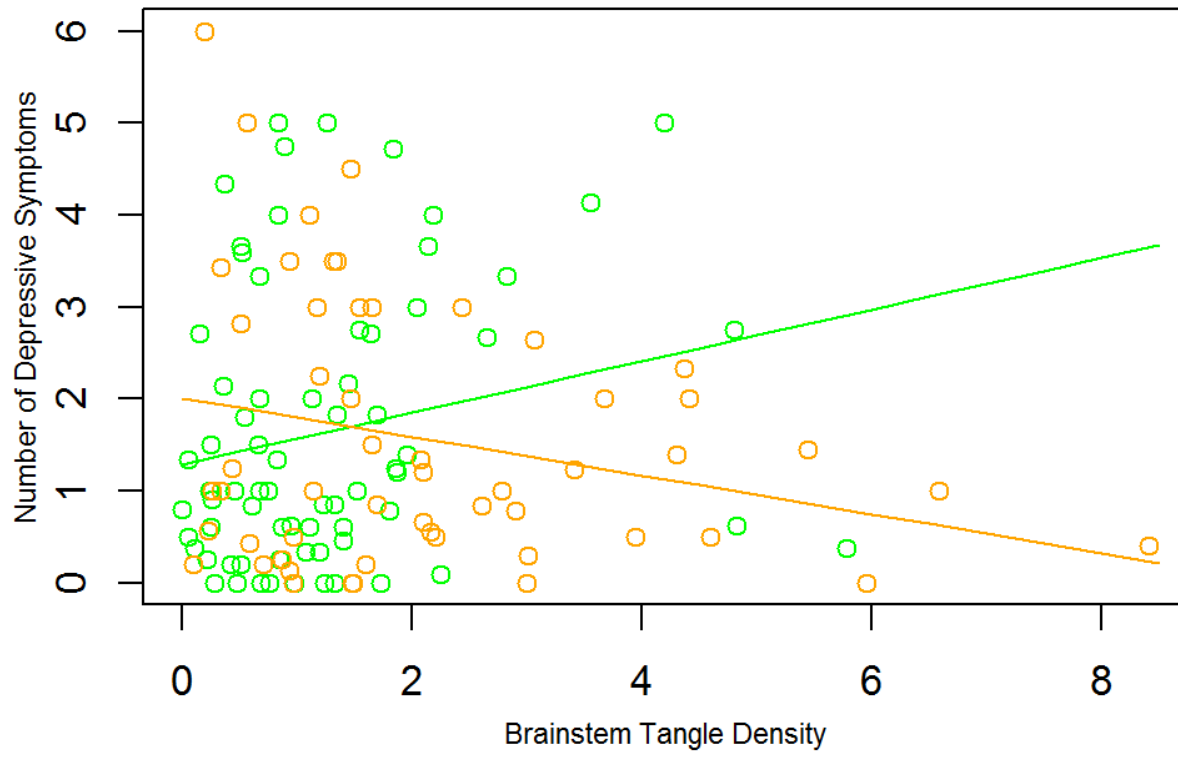

**Locus Coeruleus**

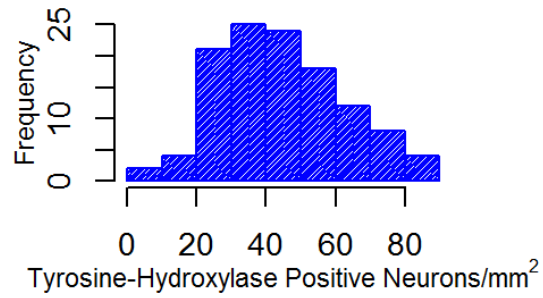

**Dorsal Raphe Nucleus**

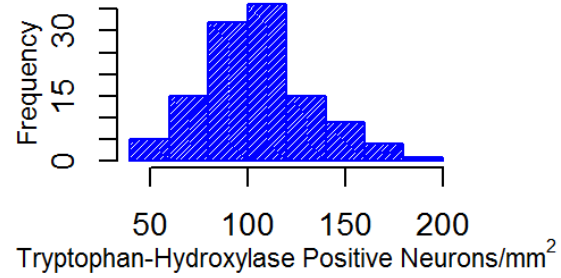

**Substantia Nigra**

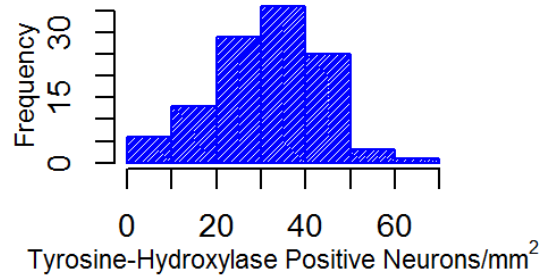

**Ventral Tegmental Area**

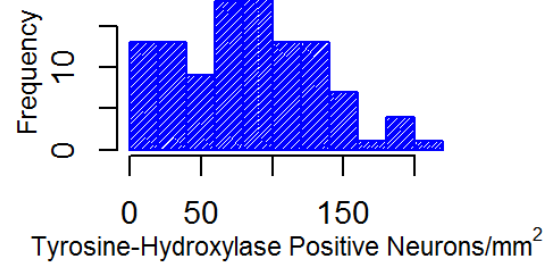

Supplement: NIHMS472626-supplement-Supplemental_Material.pdf [file NIHMS472626-supplement-Supplemental_Material.pdf]
